# Supplementary material for: BS148 Reduces the Aggressiveness of Metastatic Melanoma via Sigma-2 Receptor Targeting
Source: MDPI journal article supplement (doi:10.3390/ijms24119684), 2023-06-02
Supplement: s1 [file s1]

## BS148 reduces the aggressiveness of metastatic melanoma via Sigma-2 receptor targeting

Claudia Sorbi,<sup>1#</sup> Silvia Belluti,<sup>1#</sup> Claudio Giacinto Atene,<sup>2</sup> Federica Marocchi,<sup>3</sup> Pasquale Linciano,<sup>4</sup> Neena Roy,<sup>5</sup> Elia Paradiso,<sup>5</sup> Livio Casarini,<sup>5,6</sup> Simone Ronsisvalle,<sup>7</sup> Tommaso Zanolco-Marani,<sup>1</sup> Livio Brasili,<sup>1</sup> Luisa Lanfrancione,<sup>3</sup> Carol Imbriano,<sup>1</sup> Giulia Di Rocco<sup>1\*</sup> and Silvia Franchini<sup>1\*</sup>

<sup>1</sup>Department of Life Sciences, University of Modena and Reggio Emilia, Via Campi 287, 41125 Modena, Italy.

<sup>2</sup>Hematology Section, Department of Medical and Surgical Sciences, University of Modena and Reggio Emilia, 41124 Modena, Italy.

<sup>3</sup>Department of Experimental Oncology, IEO, European Institute of Oncology IRCCS, 20139 Milan, Italy.

<sup>4</sup>Department of Drug Sciences, University of Pavia, Pavia, Italy.

<sup>5</sup>Unit of Endocrinology, Department of Biomedical, Metabolic and Neural Sciences, University of Modena and Reggio Emilia, Ospedale di Baggiovara, via P. Giardini 1355, 41126, Modena, Italy.

<sup>6</sup>Center for Genomic Research, University of Modena and Reggio Emilia, Via G. Campi 287, 41125 Modena, Italy.

<sup>7</sup>Department of Drug and Health Sciences, Section of Medicinal Chemistry, University of Catania, 95125 Catania, Italy.

## Table of Content

|                                                                                                      |      |
|------------------------------------------------------------------------------------------------------|------|
| <b>Figure S1.</b> Fig. 2 of main text - Molecular Dynamics simulation of BS148-fluo—protein complex. | SI-2 |
| <b>Figure S2.</b> Dose-response curve for BS148-fluo at S2R                                          | SI-3 |
| <b>Figure S3.</b> Fig. 4B and 5B of main text - original images – Western Blot                       | SI-4 |
| <b>Figure S4.</b> Fig. 5C and 6A of main text - original images – Western Blot                       | SI-5 |
| <b>Table S1.</b> Fig. 4A, 4B, 5A and 6B of the main text - calculated p-values                       | SI-6 |

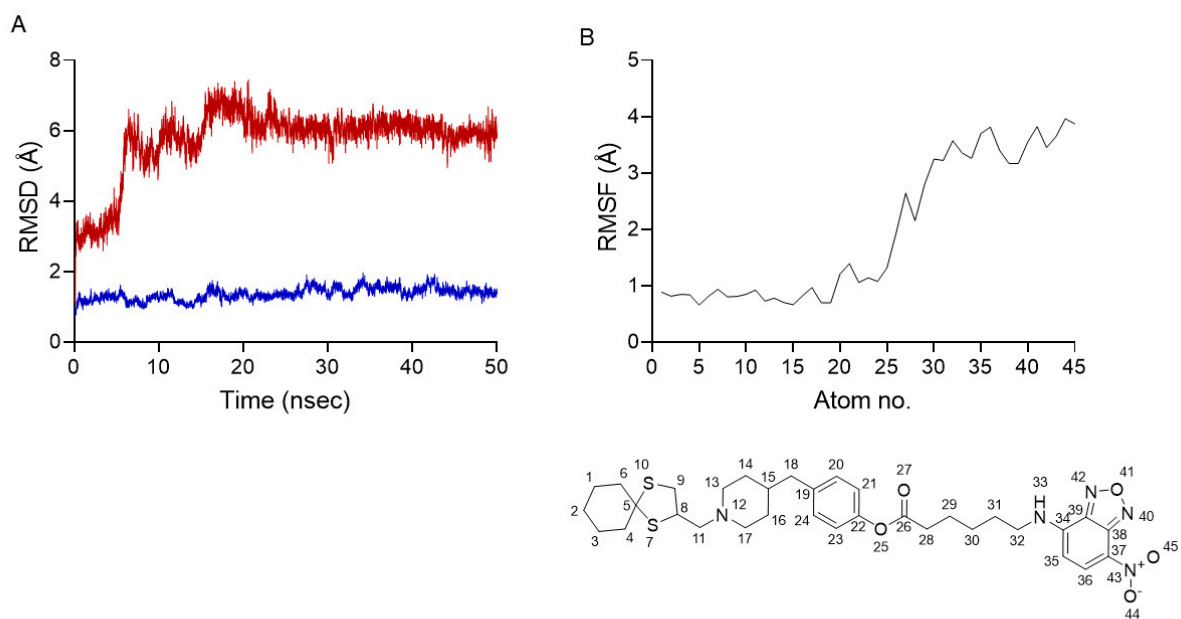

**Figure S1.** Fig. 2 of main text - Molecular Dynamics - (A) Backbone (blue line) and ligand (red line) RMSD over a period of 50 ns of MD simulation of BS148-fluo-protein complex. (B) RMSF values for BS148-fluo ligand; the atom numbering on the ligand structure is indicated.

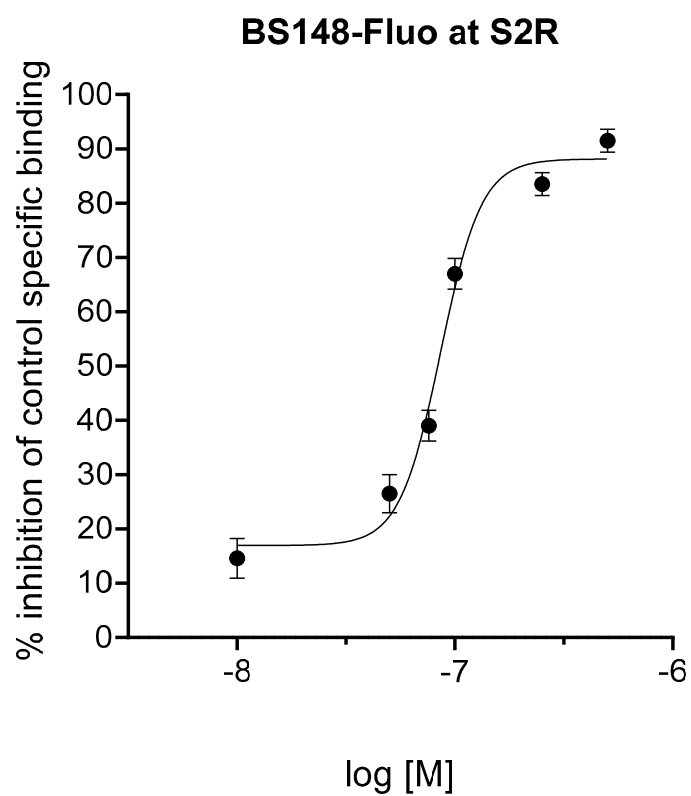

**Figure S2.** Dose-response curve for BS148-fluo at S2R.

SUPPORTING INFORMATION

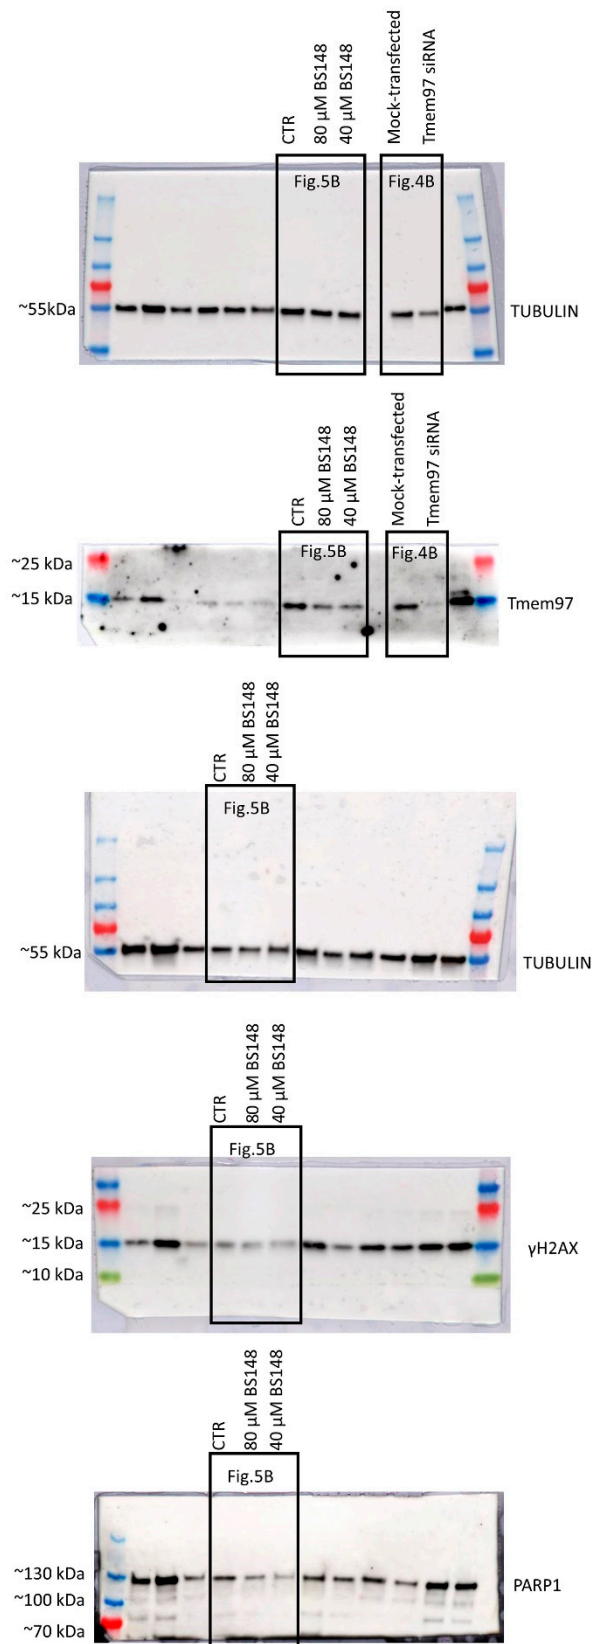

**Figure S3.** Fig. 4B and 5B of main text - original images – Western Blot

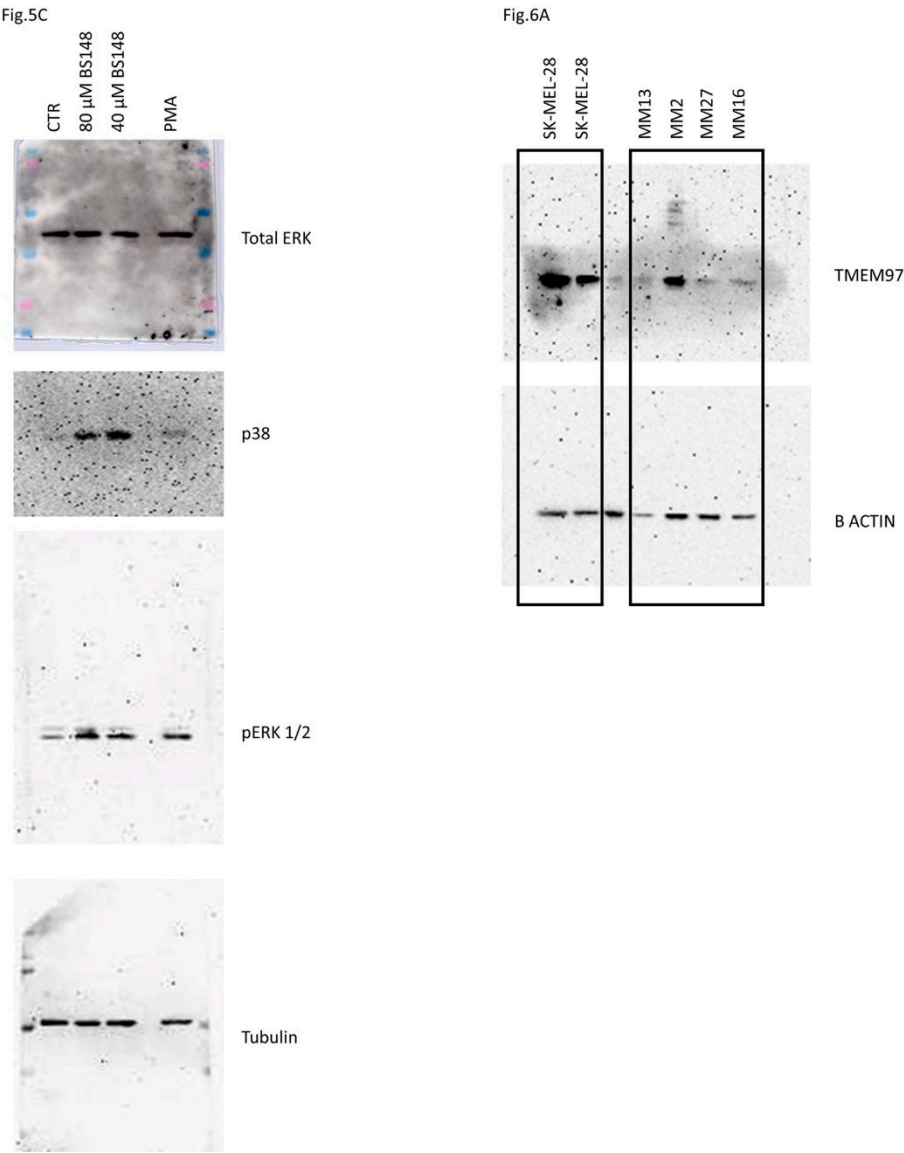

**Figure S4.** Fig. 5C and 6A of main text - original images – Western Blot

SUPPORTING INFORMATION

| Figure 4A         |         |         | Figure 4C                                 |         |         | Figure 5A                                     |                    |              | Figure 6B                                     |           |           |              |         |
|-------------------|---------|---------|-------------------------------------------|---------|---------|-----------------------------------------------|--------------------|--------------|-----------------------------------------------|-----------|-----------|--------------|---------|
| t-test            |         |         | two-way ANOVA (multiple comparisons)      |         |         | Ordinary one-way ANOVA (multiple comparisons) |                    |              | Ordinary one-way ANOVA (multiple comparisons) |           |           |              |         |
|                   |         |         |                                           |         |         |                                               |                    |              |                                               |           |           |              |         |
| Samples           | Summary | P Value | Samples                                   | Summary | P Value | Samples                                       | Summary            | Adj. P Value |                                               | 24h       | Summary   | Adj. P Value |         |
| SIGMA1R vs TMEM97 | **      | 0.0062  | 0 μM siRNA mock vs. 60 μM siRNA mock      | **      | 0.0018  | 40μM BS148 vs. CTR                            | **                 | 0.0020       | MM13                                          | Conc.(μM) | *         | 0.0440       |         |
|                   |         |         | 0 μM siRNA mock vs. 80 μM siRNA mock      | ***     | 0.0003  | 80μM BS148 vs. CTR                            | ***                | 0.0007       |                                               | 0 vs. 80  | **        | 0.0091       |         |
|                   |         |         | 0 μM siRNA mock vs. 100 μM siRNA mock     | ***     | 0.0003  | siTMEM97 vs. CTR                              | **                 | 0.0025       |                                               | 0 vs. 100 | **        | 0.0028       |         |
|                   |         |         | 60 μM siRNA mock vs. 60 μM siRNA TMEM97   | **      | 0.0047  | 40μM BS148 vs. CTR                            | ****               | < 0.0001     | MM27                                          | 0 vs. 40  | *         | 0.0151       |         |
|                   |         |         | 80 μM siRNA mock vs. 80 μM siRNA TMEM97   | *       | 0.0236  | 80μM BS148 vs. CTR                            | ****               | < 0.0001     |                                               | 0 vs. 80  | ****      | <0.0001      |         |
|                   |         |         | 100 μM siRNA mock vs. 100 μM siRNA TMEM97 | *       | 0.0239  | siTMEM97 vs. CTR                              | ****               | < 0.0001     |                                               | 0 vs. 100 | ****      | <0.0001      |         |
|                   |         |         |                                           |         |         | FDF1                                          | 40μM BS148 vs. CTR | ns           | 0.2241                                        | MM16      | 0 vs. 40  | ns           | 0.3092  |
|                   |         |         |                                           |         |         |                                               | 80μM BS148 vs. CTR | ns           | 0.0633                                        |           | 0 vs. 80  | *            | 0.0310  |
|                   |         |         |                                           |         |         |                                               | siTMEM97 vs. CTR   | ns           | 0.2241                                        |           | 0 vs. 100 | *            | 0.0127  |
|                   |         |         |                                           |         |         | FDP5                                          | 40μM BS148 vs. CTR | **           | 0.0018                                        | MM2       | 0 vs. 40  | ns           | 0.2197  |
|                   |         |         |                                           |         |         |                                               | 80μM BS148 vs. CTR | ***          | 0.0004                                        |           | 0 vs. 80  | **           | 0.0024  |
|                   |         |         |                                           |         |         |                                               | siTMEM97 vs. CTR   | **           | 0.0018                                        |           | 0 vs. 100 | ***          | 0.0002  |
|                   |         |         |                                           |         |         | ATF4                                          | 40μM BS148 vs. CTR | ns           | 0.3863                                        |           |           |              |         |
|                   |         |         |                                           |         |         |                                               | 80μM BS148 vs. CTR | **           | 0.0023                                        |           | 48h       |              |         |
|                   |         |         |                                           |         |         |                                               | siTMEM97 vs. CTR   | ns           | 0.3863                                        |           | Summary   | Adj. P Value |         |
|                   |         |         |                                           |         |         | CHOP                                          | 40μM BS148 vs. CTR | ns           | 0.683                                         | MM13      | 0 vs. 40  | ns           | 0.1424  |
|                   |         |         |                                           |         |         |                                               | 80μM BS148 vs. CTR | ***          | 0.0004                                        |           | 0 vs. 80  | ***          | 0.0008  |
|                   |         |         |                                           |         |         |                                               | siTMEM97 vs. CTR   | *            | 0.0105                                        |           | 0 vs. 100 | ****         | <0.0001 |
|                   |         |         |                                           |         |         | XBP1s                                         | 40μM BS148 vs. CTR | ns           | 0.5878                                        | MM27      | 0 vs. 40  | ns           | 0.1154  |
|                   |         |         |                                           |         |         |                                               | 80μM BS148 vs. CTR | *            | 0.0189                                        |           | 0 vs. 80  | **           | 0.0013  |
|                   |         |         |                                           |         |         |                                               | siTMEM97 vs. CTR   | *            | 0.0263                                        |           | 0 vs. 100 | ***          | 0.0006  |
|                   |         |         |                                           |         |         | BIP                                           | 40μM BS148 vs. CTR | ns           | 0.9797                                        | MM16      | 0 vs. 40  | ns           | 0.9924  |
|                   |         |         |                                           |         |         |                                               | 80μM BS148 vs. CTR | ns           | 0.9674                                        |           | 0 vs. 80  | ***          | 0.0002  |
|                   |         |         |                                           |         |         |                                               | siTMEM97 vs. CTR   | ns           | 0.9797                                        |           | 0 vs. 100 | ****         | <0.0001 |
|                   |         |         |                                           |         |         |                                               |                    |              |                                               | MM2       | 0 vs. 40  | **           | 0.0030  |
|                   |         |         |                                           |         |         |                                               |                    |              |                                               |           | 0 vs. 80  | ****         | <0.0001 |
|                   |         |         |                                           |         |         |                                               |                    |              |                                               |           | 0 vs. 100 | ****         | <0.0001 |

**Table S1.** Fig. 4A, 4C, 5A and 6B of the main text - calculated p-values (Prism software). (\* p < 0.05; \*\* p < 0.01; \*\*\* p < 0.001; \*\*\*\* p < 0.0001; ns, not significant).
